# Supplementary material for: A design strategy for D–A conjugated polymers for NIR-II fluorescence imaging
Source: Royal Society of Chemistry journal article supplement (doi:10.1039/d1py00470k), 2021-01-01
Supplement: d1py00470k1.pdf [file d1py00470k1.pdf]

## Supporting information

### A design strategy of D-A conjugated polymer for NIR-II fluorescence imaging

Yingbin Su,<sup>†a</sup> Yawei Miao,<sup>†a</sup> Yaowei Zhu,<sup>a</sup> Wentao Zou,<sup>a</sup> Bing Yu,<sup>a,b</sup> Youqing Shen,<sup>a,c</sup> Hailin Cong,<sup>\*a,b</sup>

[a] Y. Su, Y. Miao, Y. Zhu, W., Zou, Y. Shen, H. Cong, Institute of Biomedical Materials and Engineering, College of Materials Science and Engineering; Qingdao University; Qingdao 266071, China. E-mail: hailincong@yahoo.com

[b] B. Yu, H. Cong, State Key Laboratory of Bio-Fibers and Eco-Textiles, College of Chemistry and Chemical Engineering; Qingdao University; Qingdao 266071, China.

[c] Y. Shen, Key Laboratory of Biomass Chemical Engineering of Ministry of Education, Center for Bionanoengineering, and Department of Chemical and Biological Engineering; Zhejiang University; Hangzhou 310027, China.

<sup>†</sup> Yingbin Su and Yawei Miao contributed equally to this work.

## Synthesis

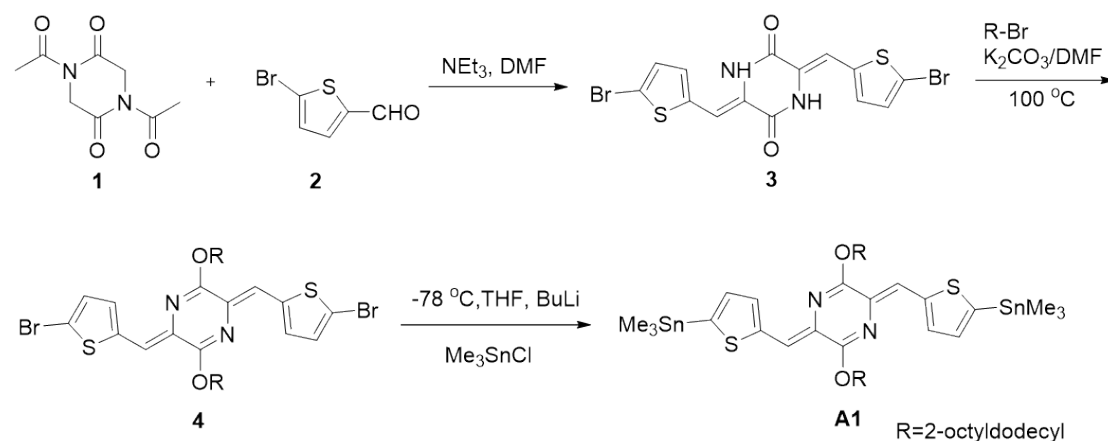

Scheme S1. The synthesis route of A1.

### 3,6-Bis((5-bromothiophen-2-yl)methylene)piperazine-2,5-dione (3)

Into a mixture of 1 (1.19 g, 6.0 mmol) and 2 (2.87 g, 15.0 mmol) in DMF (30 mL) was syringe injected triethylamine (2.43 g, 24.0 mmol) at  $120\text{ }^\circ\text{C}$  under  $\text{N}_2$  sphere. The original colorless solution turned red immediately upon addition. Yellow precipitate was formed during the overnight reaction. After cooling to room temperature, the precipitate was collected by filtration and rinsed with acetone. The residue was recrystallized twice from ethanol to yield the desired compounds as yellow solid (1.48 g, 53.8%).  $^1\text{H NMR}$  (400 MHz, *d*-DMSO):  $\delta$  (ppm) 9.85 (s, 2H), 7.35 (s, 2H), 7.28 (s, 2H), 6.88 (s, 2H).

### 2,5-Bis((5-bromothiophen-2-yl)methylene)-3,6-bis(2-octyldodecyl)-2,5-dihydropyrazine (4)

A mixture of 3 (1.47 g, 3.19 mmol),  $\text{K}_2\text{CO}_3$  (2.20 g, 15.95 mmol) and 9-(bromomethyl)nonadecane (4.67 g, 12.90 mmol) in DMF (40 mL) was stirred at  $100\text{ }^\circ\text{C}$  for 2 hours under  $\text{N}_2$  sphere. After cooling to room temperature, the reaction mixture was filtered, and the filtrate was concentrated by rotary evaporation under reduced pressure. The residue was purified by column chromatography on silica gel (eluent: petroleum ether/ $\text{CHCl}_3$  gradient from 9:1 to 4:1) to give an orange solid (1.65 g, 50.0 %).  $^1\text{H NMR}$  (400 MHz,  $\text{CDCl}_3$ ):  $\delta$  (ppm) 7.03 (d, 2H), 7.02 (s, 2H), 7.00 (d, 2H), 4.37 (d, 4H), 1.95 (m, 2H), 1.50-1.38 (m, 16H), 1.32-1.23 (m, 48H), 0.90-0.85 (m, 12H).  $^{13}\text{C NMR}$  ( $\text{CDCl}_3$ , 100 MHz):  $\delta$  157.90, 140.67, 129.92, 129.11, 128.49, 118.70, 116.45, 71.16, 37.23, 31.94, 31.65, 30.11, 29.75, 29.71, 29.69, 29.65, 29.40, 26.83, 22.71, 14.15.

### 2,5-Bis((5-(trimethylstannyl)thiophen-2-yl)methylene)-3,6-bis(2-octyldodecyl)-2,5-dihydropyrazine (A1)

Compound 4 (1.0 g, 0.97 mmol) was solubilized by 70 mL of dry THF under nitrogen atmosphere. The mixture was cooled down to -78 °C, and *n*-BuLi (1.37 mL of a 1.6 M solution in hexane, 2.20 mmol) was added dropwise. After being stirred at -78 °C for 1 h, trimethyltin chloride (2.5 mL of a 1.0 M solution in hexane, 2.5 mmol) was added, then the mixture turned clear. The reaction mixture was stirred overnight at room temperature, then poured into 100 mL of cool water, and was extracted with diethyl ether. The organic layers were combined, washed with brine, dried over anhydrous Na<sub>2</sub>SO<sub>4</sub> and concentrated under vacuum. The residue was washed twice by methyl alcohol to yield the desired compounds as yellow solid (0.88 g, 75.6%). <sup>1</sup>H NMR (400 MHz, CDCl<sub>3</sub>): δ (ppm) 7.38 (d, 2H), 7.17 (s, 2H), 7.16 (d, 2H), 4.41 (d, 4H), 1.92 (m, 2H), 1.41-1.25 (m, 48H), 0.88-0.84 (m, 12H), 0.37 (t, 18H).

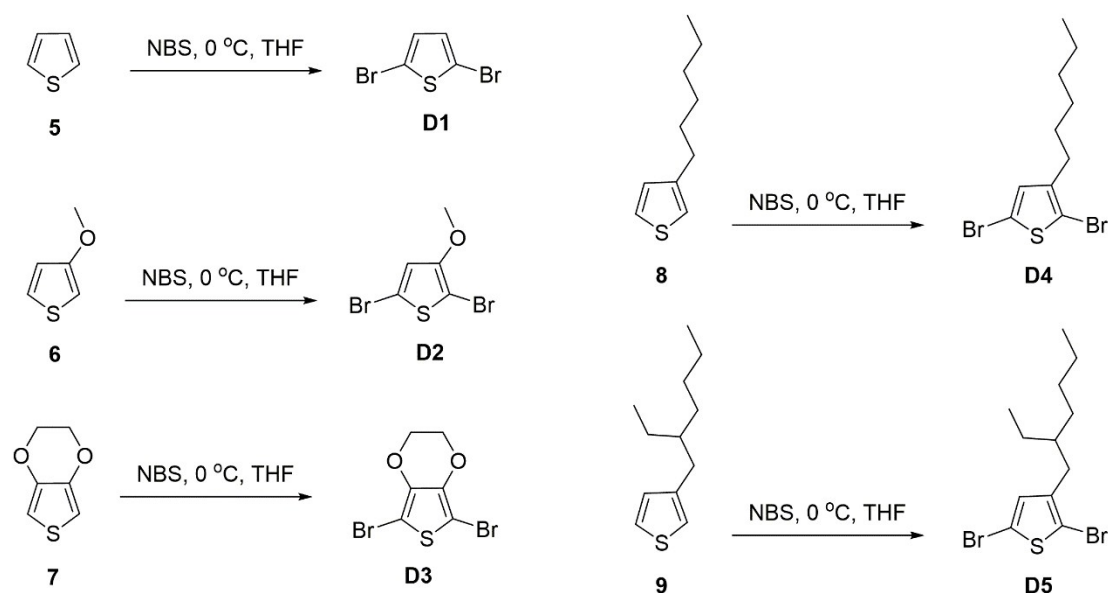

Scheme S2. The synthesis route of donor .

### 2,5-Dibromothiophene (D1)

5 (5.0 g, 59.43 mmol) and N-bromosuccinimide (NBS) (22.2 g, 124.79 mmol) were added into THF under stirring at 0 °C. The reaction mixture was stirred at a room temperature for 8 h, and then the reaction mixture was washed with brine and dried over anhydrous sodium sulfate. The solvent was removed under a reduced pressure. The residue was purified by column chromatography on silica gel (eluent: petroleum ether) to give a colourless oil (11.80 g, 82.0 %). <sup>1</sup>H NMR (400 MHz, CDCl<sub>3</sub>): δ (ppm) 6.84 (s, 2H).

#### **2,5-dibromo-3-methoxythiophene (D2)**

6 (0.5 g, 4.38 mmol) and NBS (1.59 g, 8.43 mmol) were added into THF under stirring at 0 °C. The reaction mixture was stirred at a room temperature for 8 h, and then the reaction mixture was washed with brine and dried over anhydrous sodium sulfate. The solvent was removed under a reduced pressure. The residue was purified by column chromatography on silica gel (eluent: petroleum ether) to give a light yellow solid (1.06 g, 89.3 %). <sup>1</sup>H NMR (400 MHz, CDCl<sub>3</sub>): δ (ppm) 6.79 (s, 1H), 3.86 (s, 3H).

#### **5,7-Dibromo-2,3-dihydrothieno[3,4-b][1,4]dioxine (D3)**

7 (2.0 g, 14.07 mmol) and NBS (5.13 g, 28.84 mmol) were added into THF under stirring at 0 °C. The reaction mixture was stirred at a room temperature for 8 h, and then the reaction mixture was washed with brine and dried over anhydrous sodium sulfate. The solvent was removed under a reduced pressure. The residue was purified by column chromatography on silica gel (eluent: petroleum ether) to give white power (4.01 g, 95.0 %). <sup>1</sup>H NMR (400 MHz, CDCl<sub>3</sub>): δ (ppm) 4.27 (s, 4H).

#### **2,5-Dibromo-3-hexylthiophene (D4)**

8 (3.0 g, 17.83 mmol) and NBS (6.50 g, 36.54 mmol) were added into THF under stirring at 0 °C. The reaction mixture was stirred at a room temperature for 8 h, and then the reaction mixture was washed with brine and dried over anhydrous sodium sulfate. The solvent was removed under a reduced pressure. The residue was purified by column chromatography on silica gel (eluent: petroleum ether) to give a colourless oil (5.23 g, 90.0 %). <sup>1</sup>H NMR (400 MHz, CDCl<sub>3</sub>): δ (ppm) 6.77 (s, 1H), 2.50 (t, 2H), 1.56-1.49 (m, 2H), 1.36-1.25 (m, 6H), 0.89 (t, J = 6.7 Hz, 3H).

#### **2,5-dibromo-3-(2-ethylhexyl)thiophene (D5)**

9 (2.0 g, 10.19 mmol) and NBS (3.72 g, 20.88 mmol) were added into THF under stirring at 0 °C. The reaction mixture was stirred at a room temperature for 8 h, and then the reaction mixture was washed with brine and dried over anhydrous sodium sulfate. The solvent was removed under a reduced pressure. The residue was purified by column chromatography on silica gel (eluent: petroleum ether) to give a light yellow oil (3.30 g, 91.4 %). <sup>1</sup>H NMR (400 MHz, CDCl<sub>3</sub>): δ (ppm) 6.74 (s, 1H), 2.44 (d, 2H), 1.58-1.52 (m, 1H), 1.32-1.23 (m, 8H), 0.90-0.84 (m, 6H).

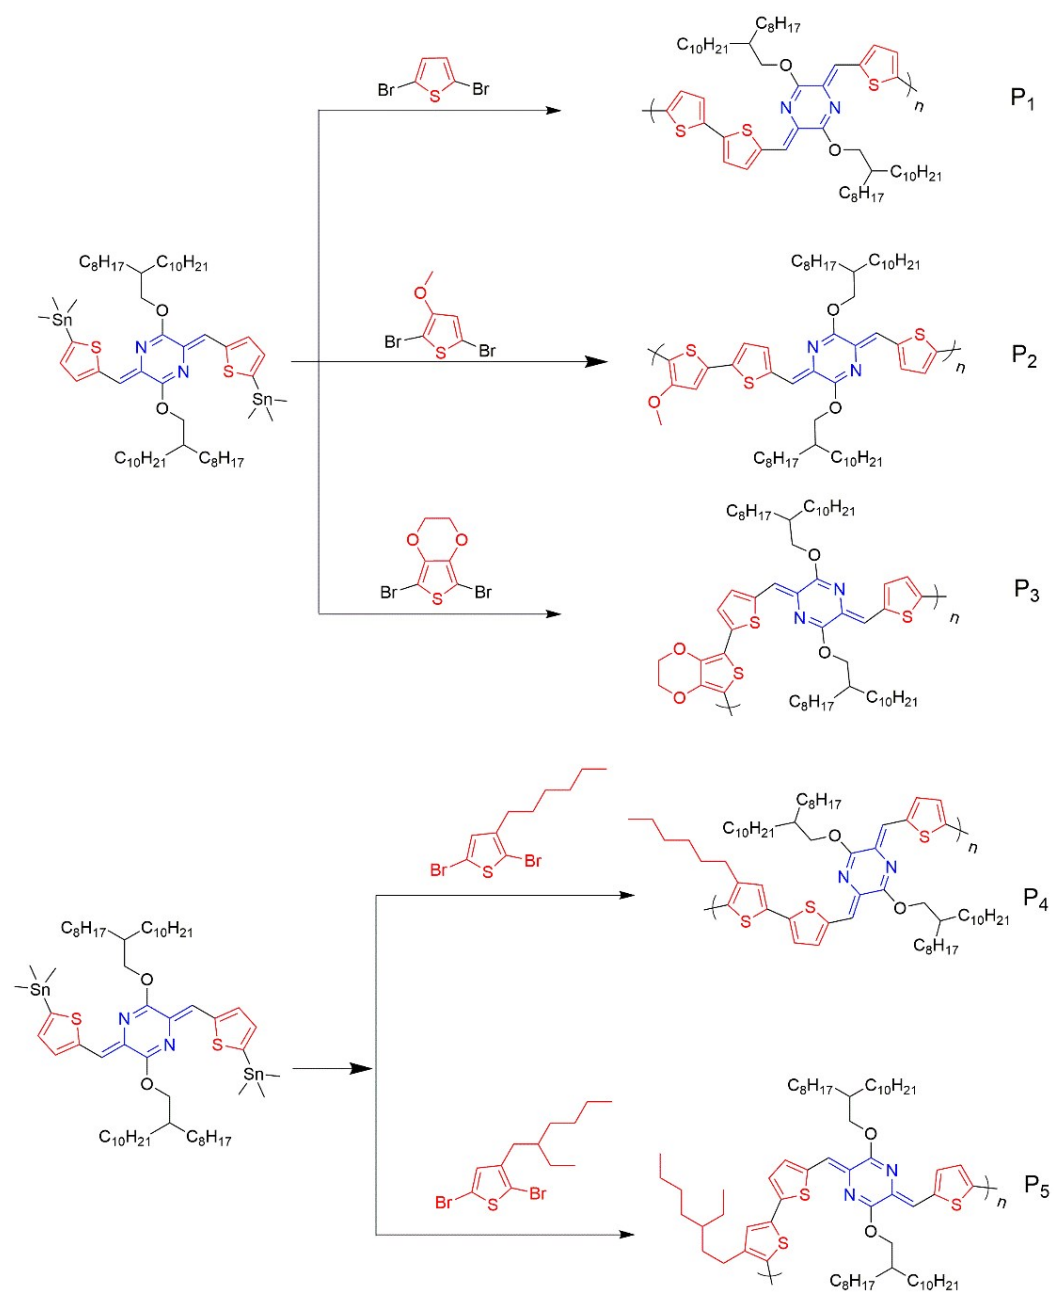

Scheme S3. The synthesis route of polymers.

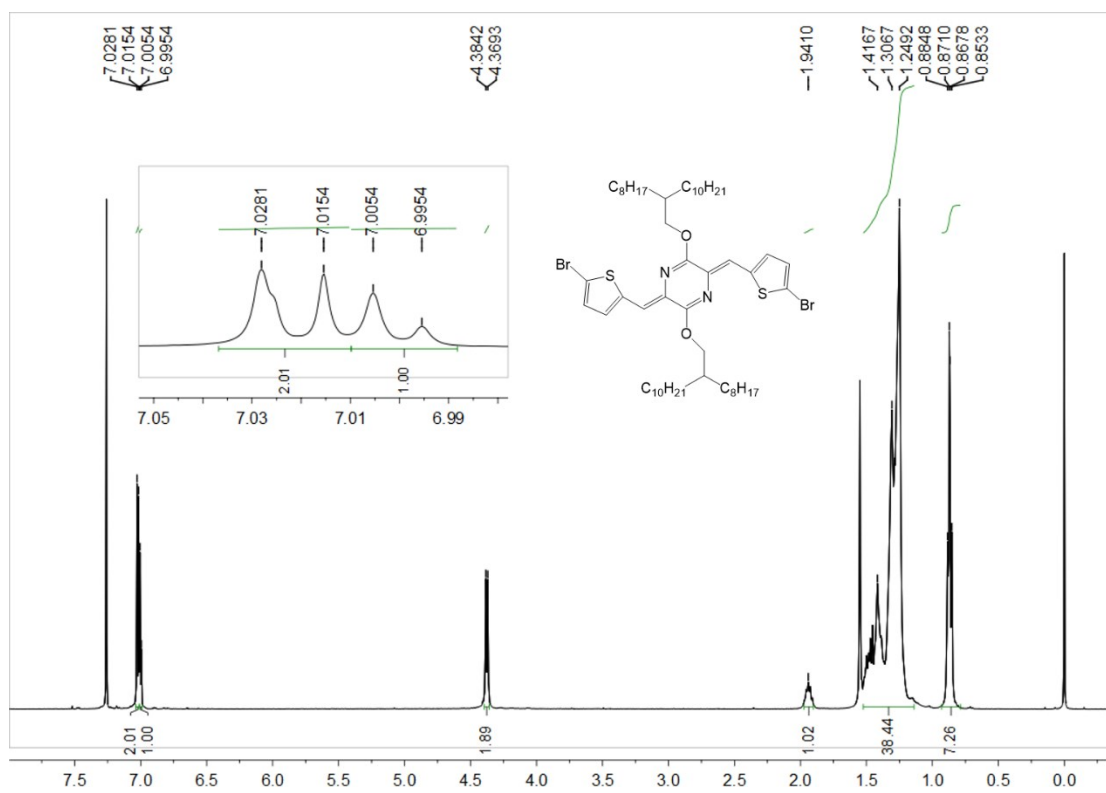

Figure S1.1 <sup>1</sup>H NMR Spectrum of the 4. The inset show a zoomed-in view of the spectrum in the 6.963-7.065 ppm region. (CDCl<sub>3</sub>, 298K)

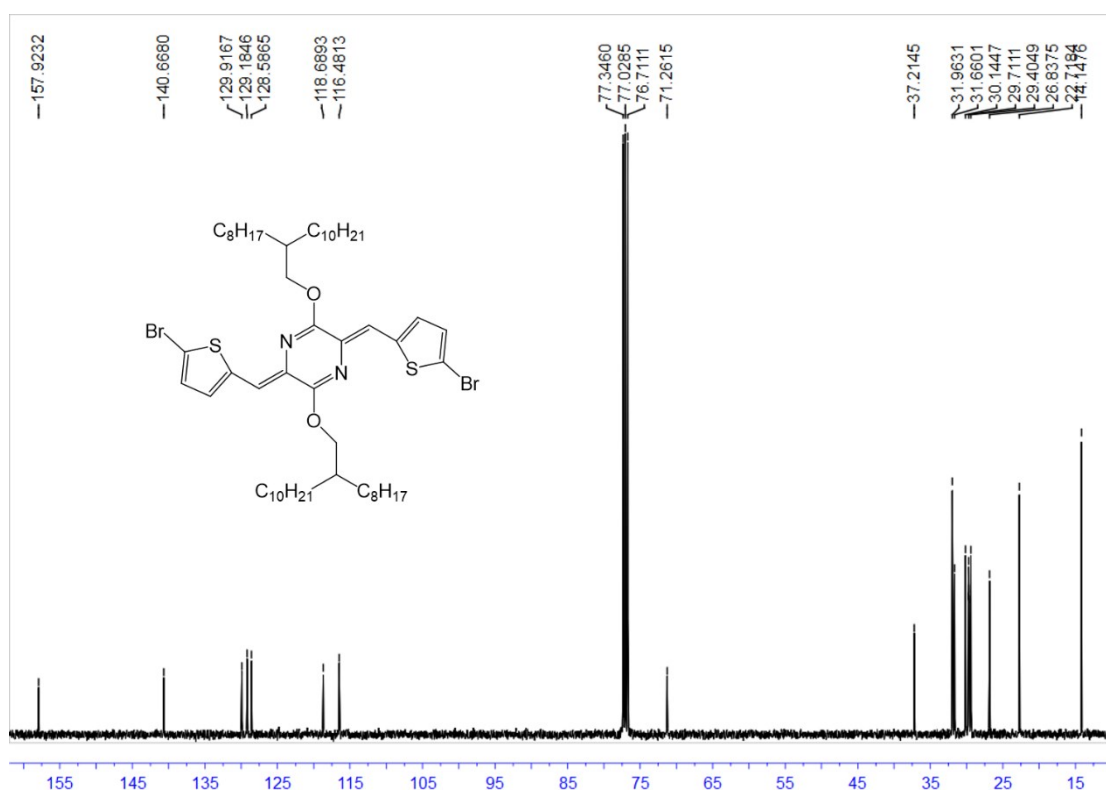

Figure S1.2 <sup>13</sup>C NMR Spectrum of the 4. (CDCl<sub>3</sub>, 298K)

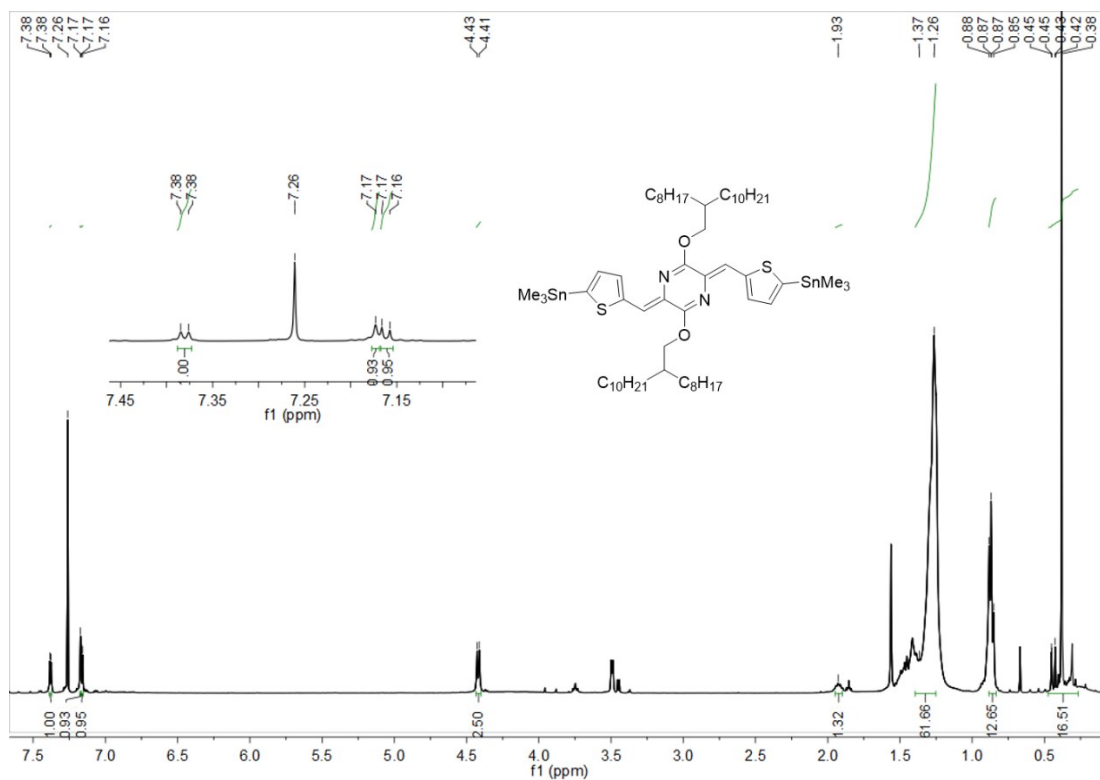

Figure S1.3  $^1\text{H}$  NMR Spectrum of the A1. The inset show a zoomed-in view of the spectrum in the 7.04-7.48 ppm region. ( $\text{CDCl}_3$ , 298K)

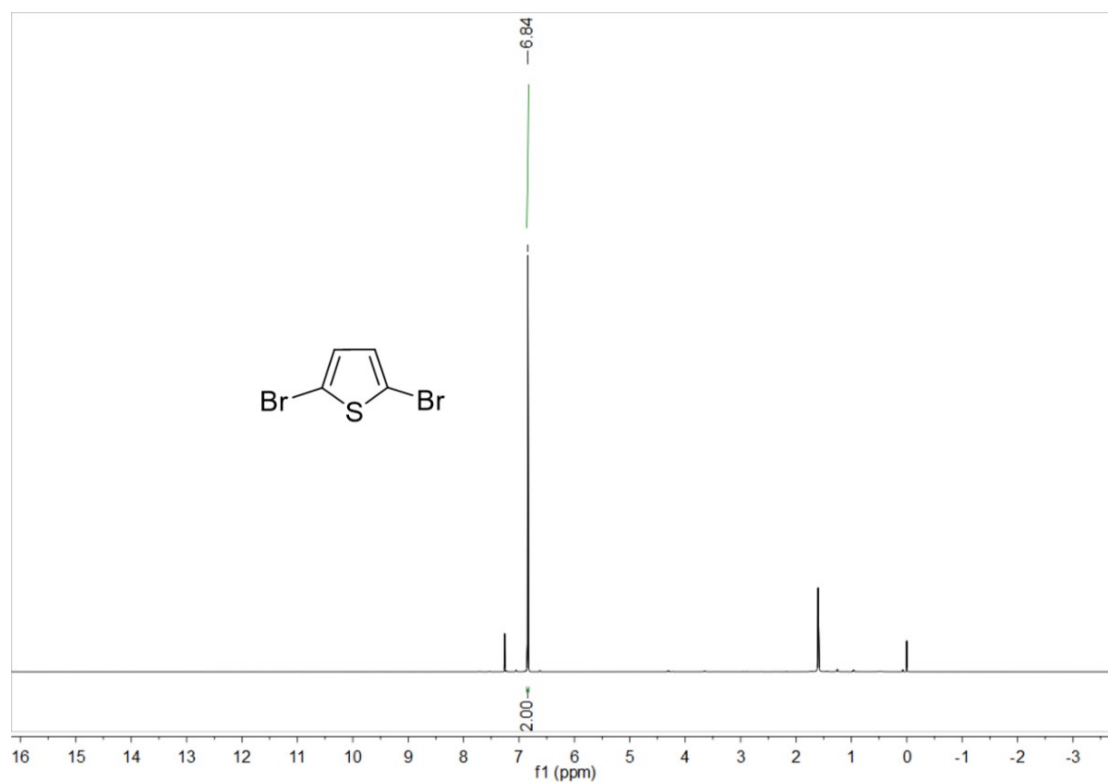

Figure S1.4  $^1\text{H}$  NMR Spectrum of the D1. ( $\text{CDCl}_3$ , 298K)

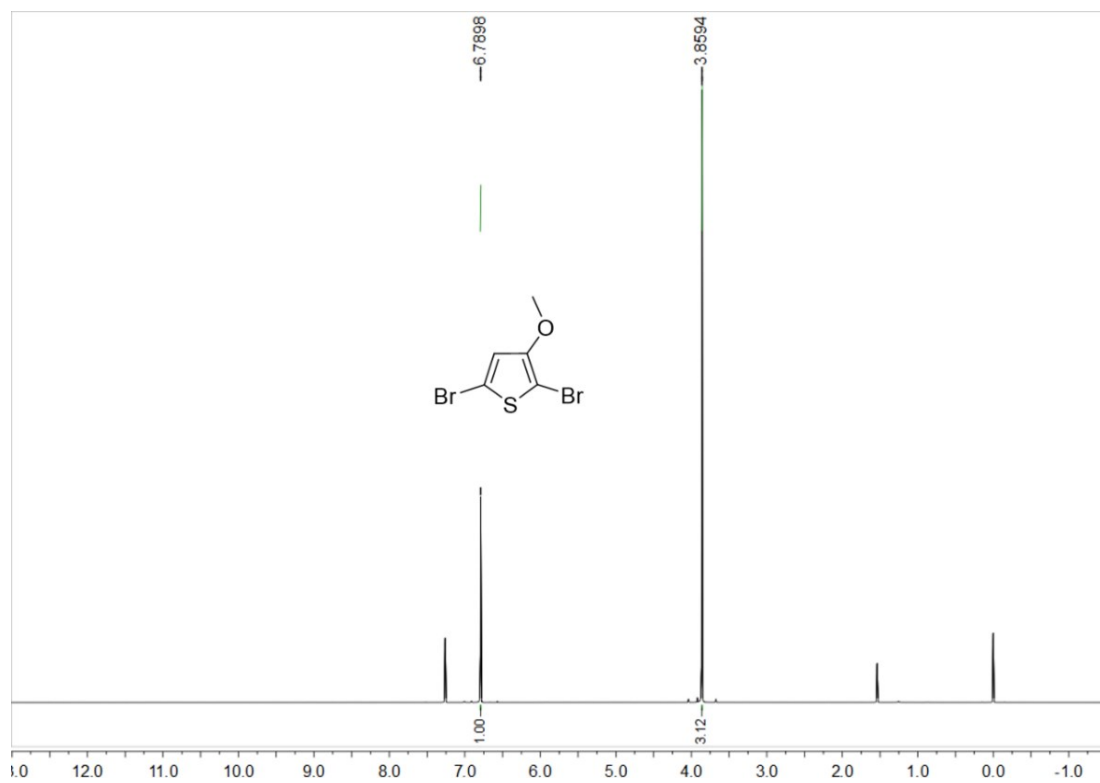

Figure S1.5 <sup>1</sup>H NMR Spectrum of the D2. (CDCl<sub>3</sub>, 298K)

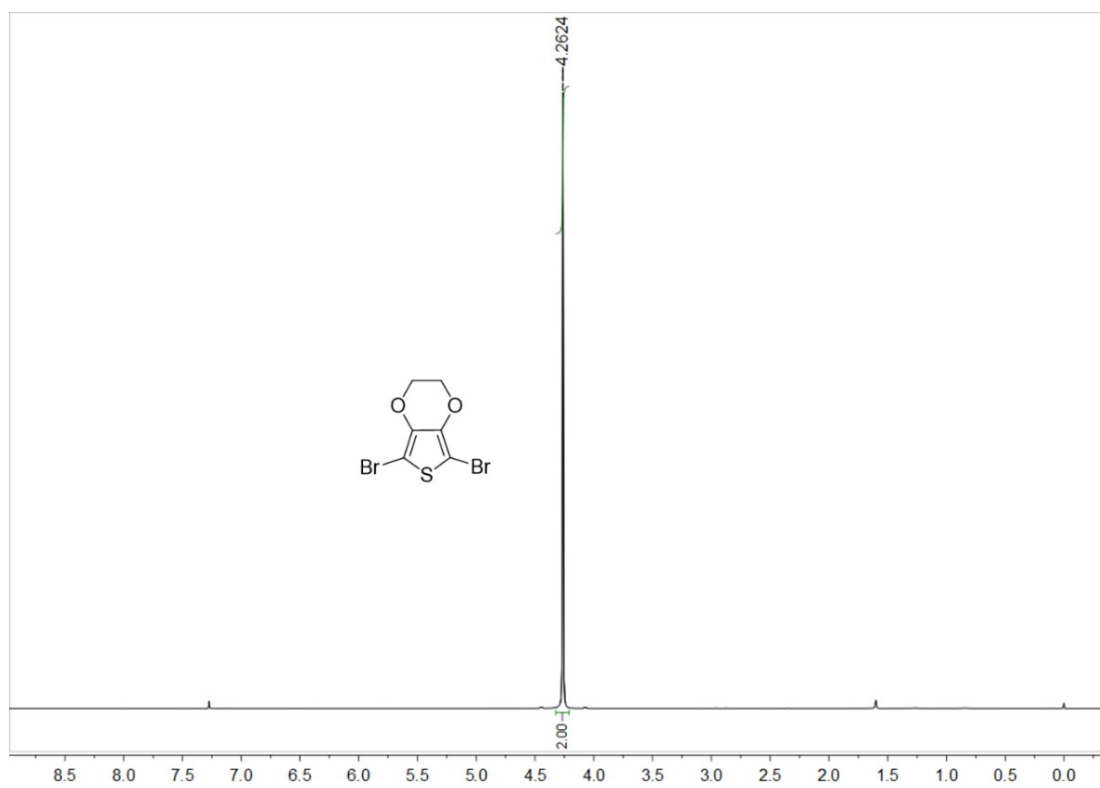

Figure S1.6 <sup>1</sup>H NMR Spectrum of the D3. (CDCl<sub>3</sub>, 298K)



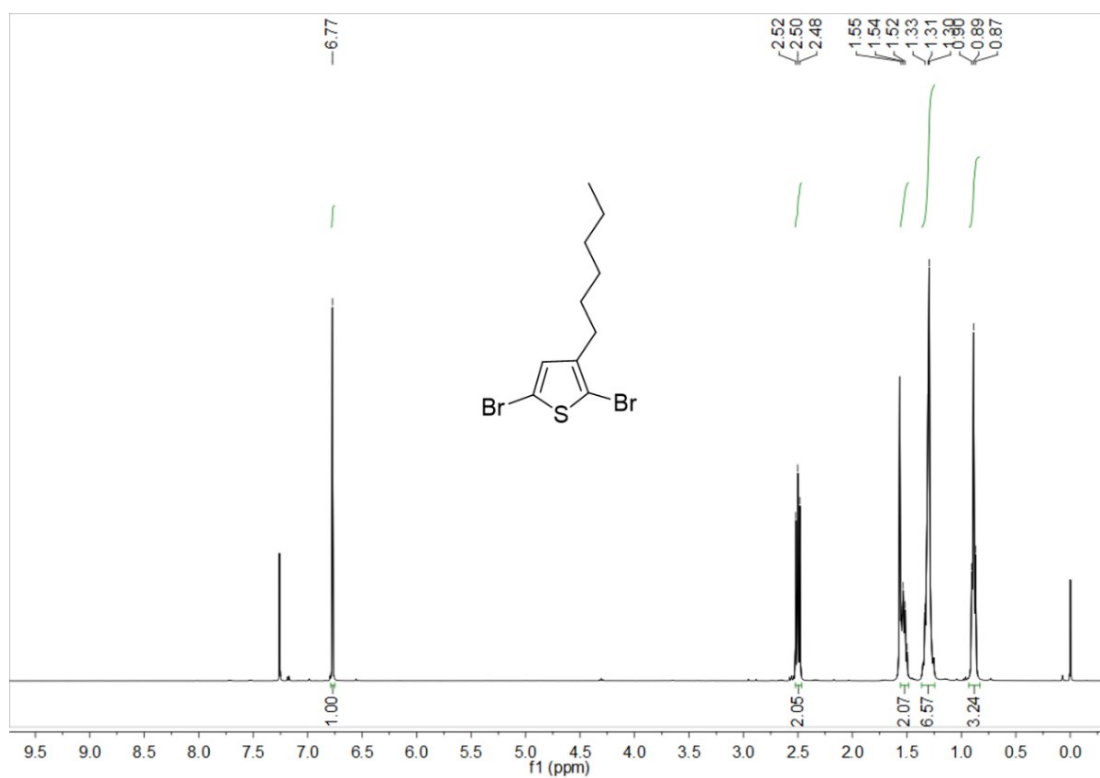

Figure S1.7  $^1\text{H}$  NMR Spectrum of the D4. ( $\text{CDCl}_3$ , 298K)

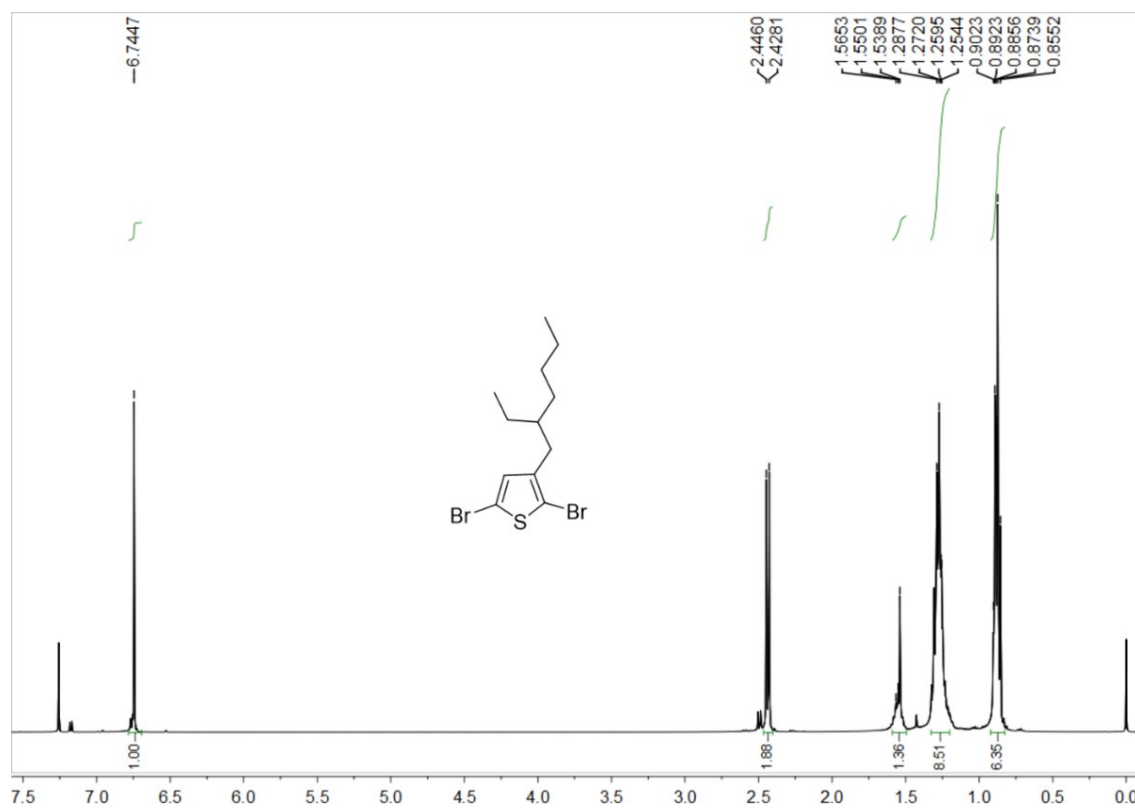

Figure S1.8  $^1\text{H}$  NMR Spectrum of the D5. ( $\text{CDCl}_3$ , 298K)

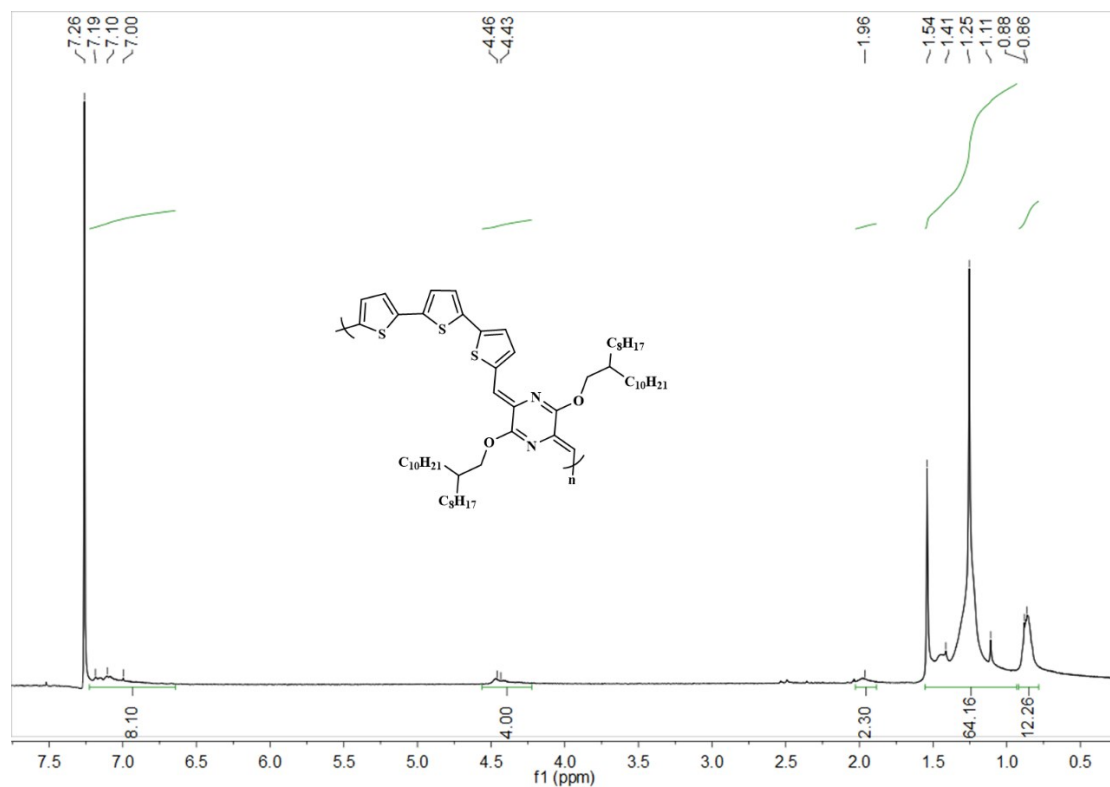

Figure S1.9 <sup>1</sup>H NMR Spectrum of the P1. (CDCl<sub>3</sub>, 298K)

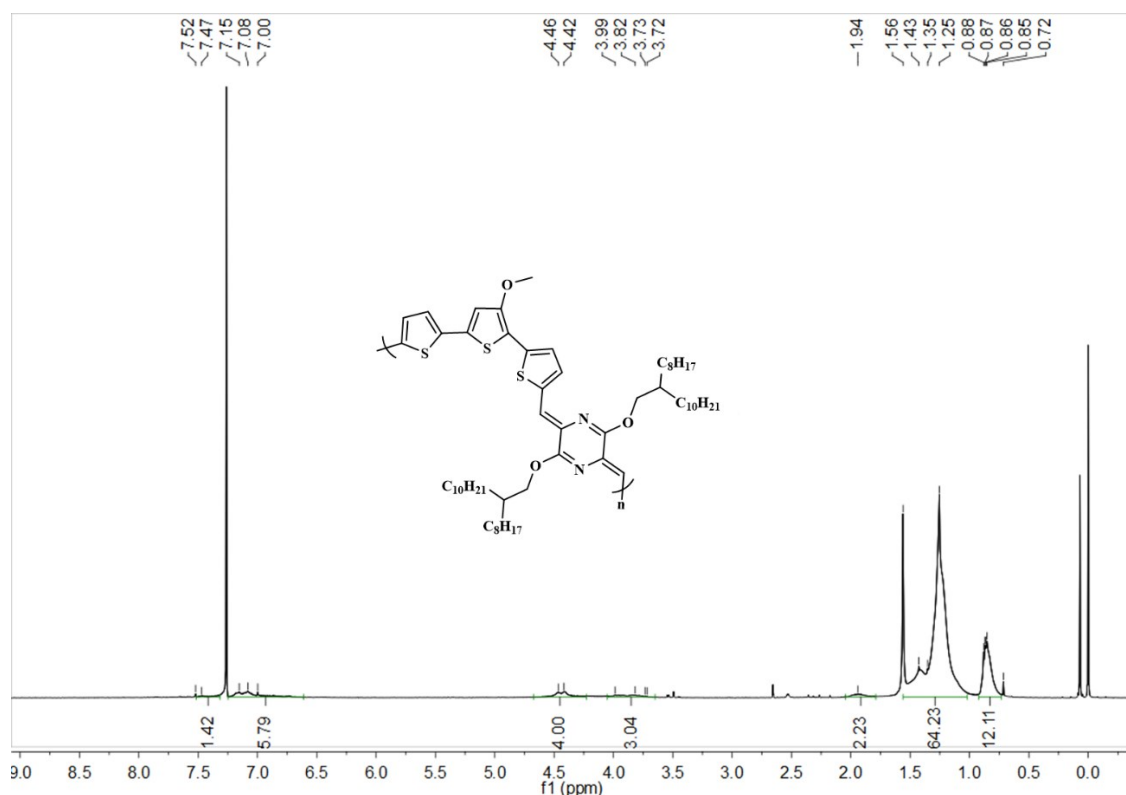

Figure S1.10 <sup>1</sup>H NMR Spectrum of the P2. (CDCl<sub>3</sub>, 298K)

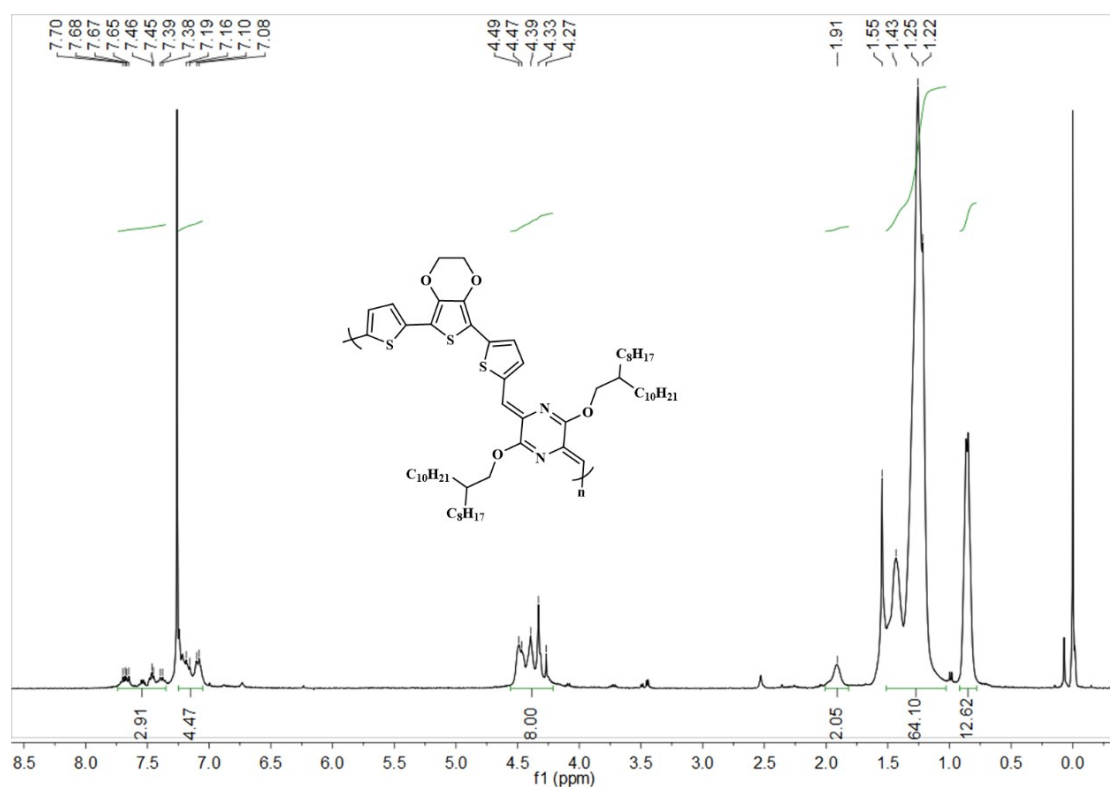

Figure S1.11  $^1\text{H}$  NMR Spectrum of the P3. ( $\text{CDCl}_3$ , 298K)

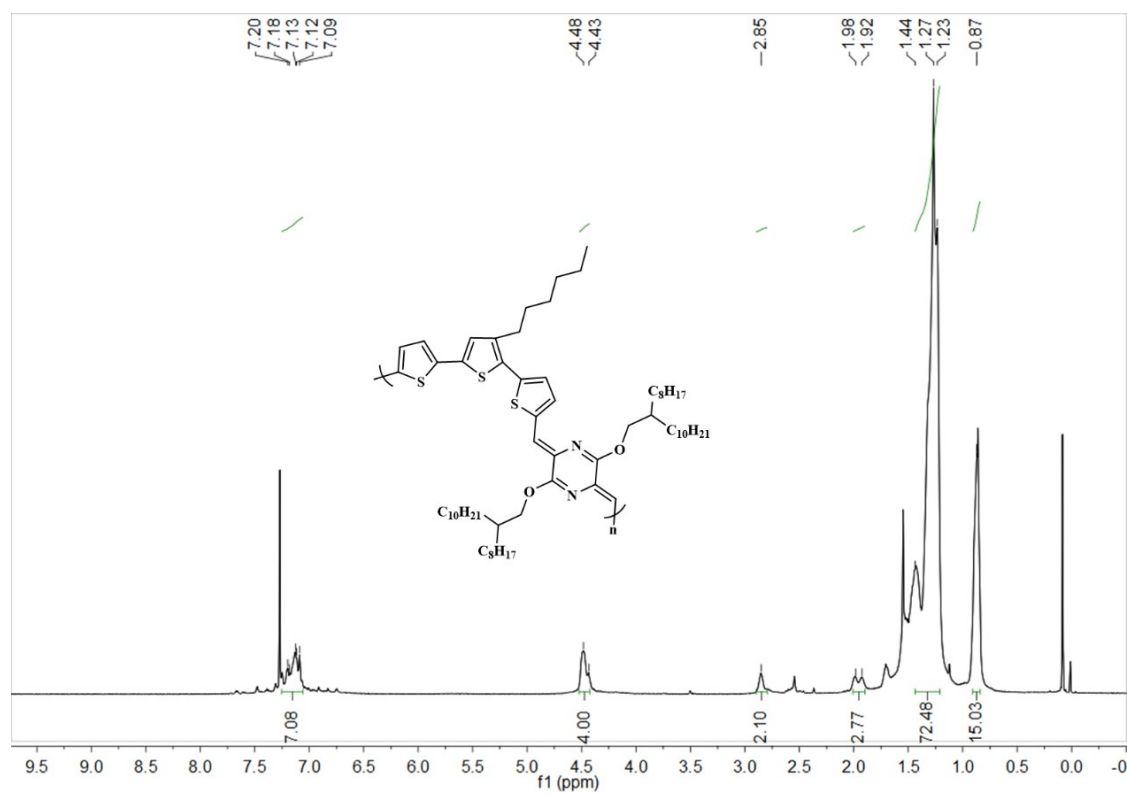

Figure S1.12  $^1\text{H}$  NMR Spectrum of the P4. ( $\text{CDCl}_3$ , 298K)

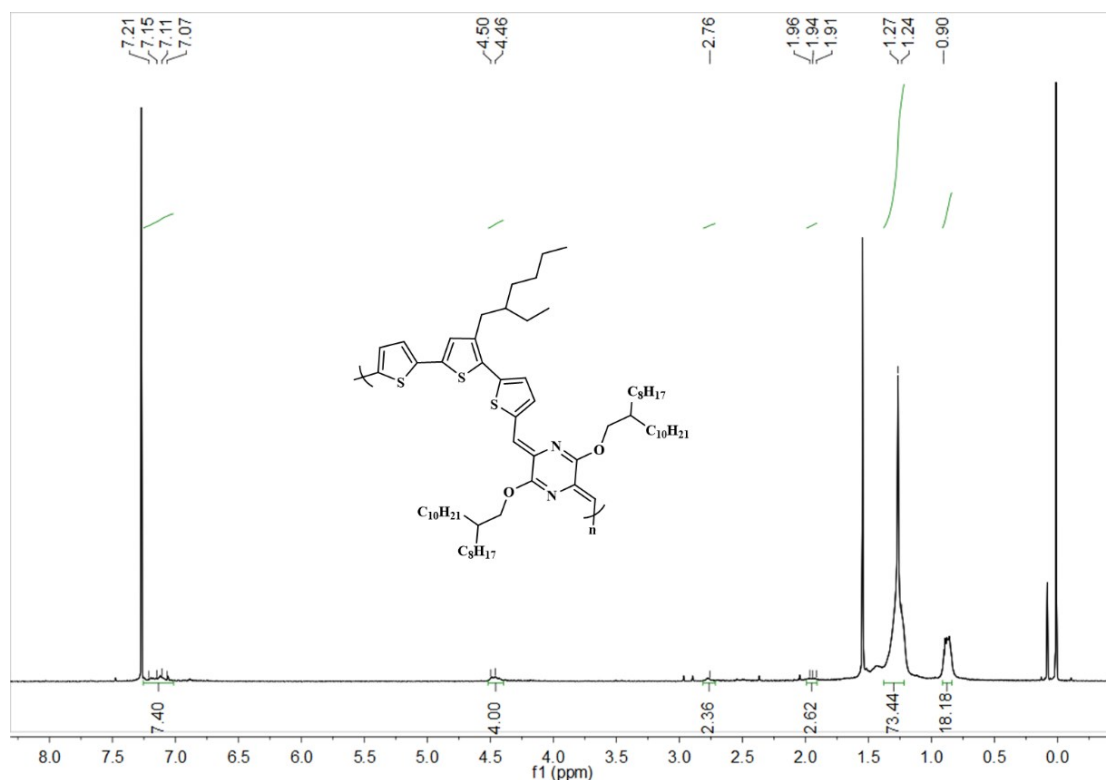

Figure S1.13  $^1\text{H}$  NMR Spectrum of the P5. ( $\text{CDCl}_3$ , 298K)

### Preparation of polymer nanoparticles (NPs) (S1)

First, 1 mg of polymer and 6 mg of DSPE-mPEG<sub>2000</sub> were dissolved in 4 mL THF and quickly added into 36 mL of distilled water under the action of strong ultrasound. After 5 min of ultrasound, THF and most of the water were removed by vacuum distillation to obtain 1 mL of NPs solution with a concentration of 1 mg mL<sup>-1</sup>.

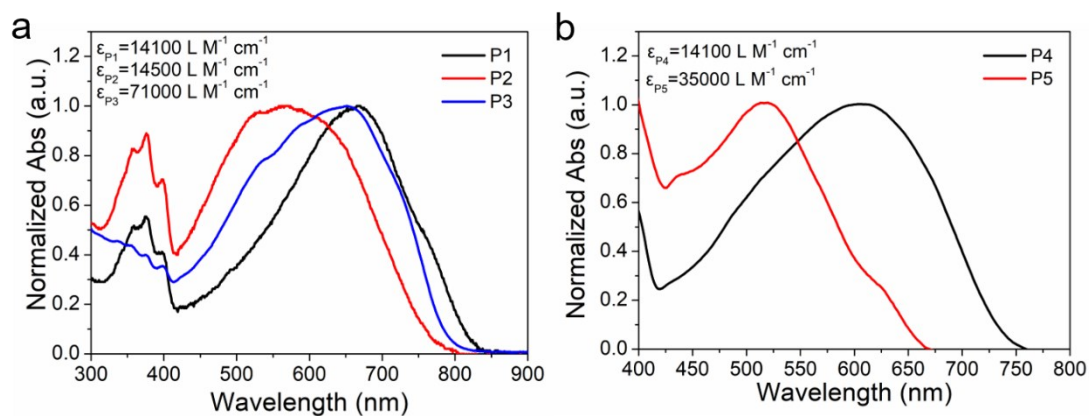

Figure S2 a) and b) the UV-Vis-NIR absorption spectrum of the P1 NPs, P2 NPs, P3 NPs, P4 NPs, and P5 NPs in chloroform solution, respectively.

Table S1. Gel Permeation Chromatography (GPC) Spectrum of polymers.

| Dye | $M_w$ [g/mol]       | $M_n$               | PDI   |
|-----|---------------------|---------------------|-------|
| P1  | $7.457 \times 10^3$ | $6.384 \times 10^3$ | 1.168 |
| P2  | $5.936 \times 10^3$ | $5.973 \times 10^3$ | 0.994 |
| P3  | $7.572 \times 10^3$ | $5.449 \times 10^3$ | 1.389 |
| P4  | $9.469 \times 10^3$ | $5.787 \times 10^3$ | 1.636 |
| P5  | $3.455 \times 10^3$ | $8.242 \times 10^2$ | 4.192 |

Molecular weight and polydispersity of polymer are listed in table. Number-average molecular weight:  $M_n$ ; Weight-average molecular weight:  $M_w$ ; Polydispersity index: PDI. Note: The polydispersity less than or near 1 in the above polymers may be due to error or other reasons.

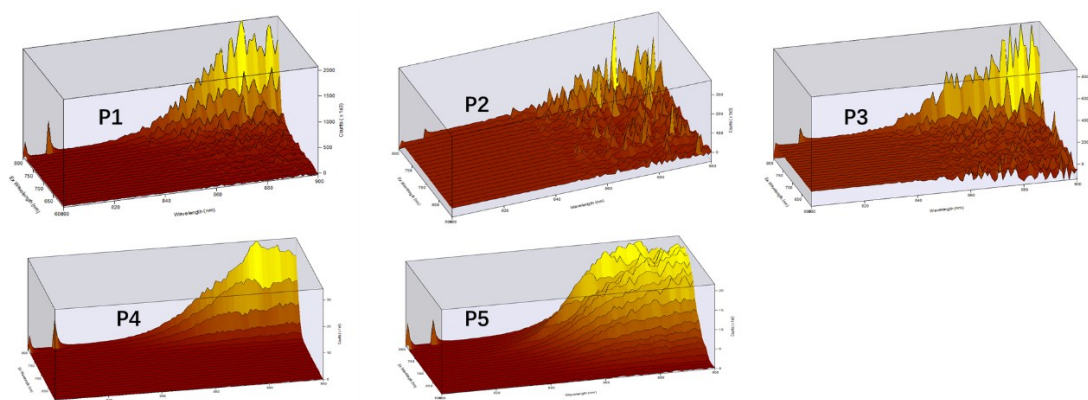

Figure S3 Photoluminescence excitation mapping of P1-P5.

### Theoretical Calculation (S2)

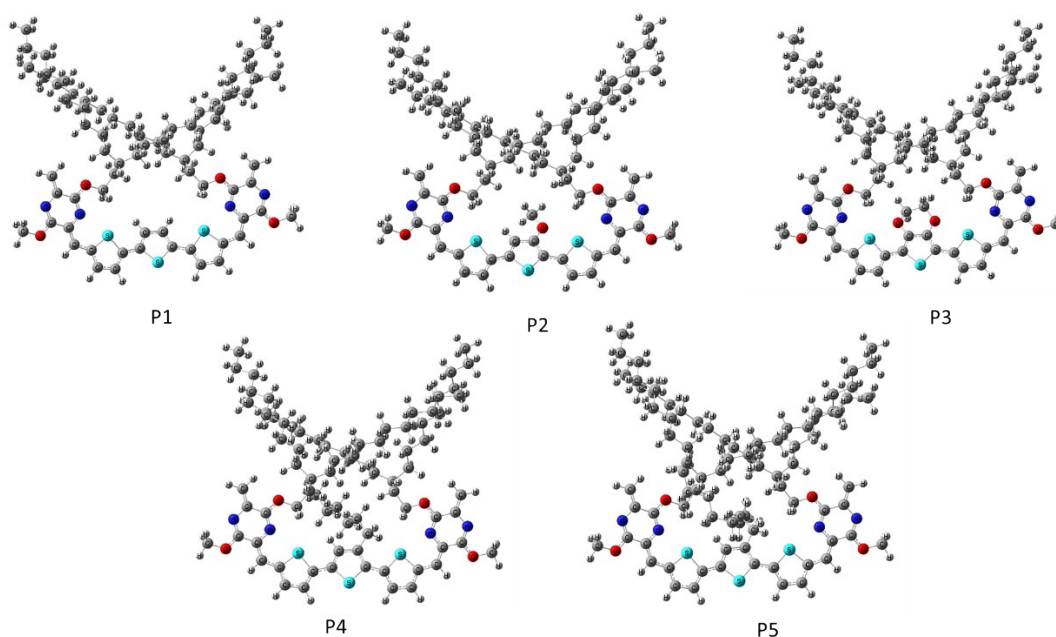

#### S2.1 P1~P5 simulation system.

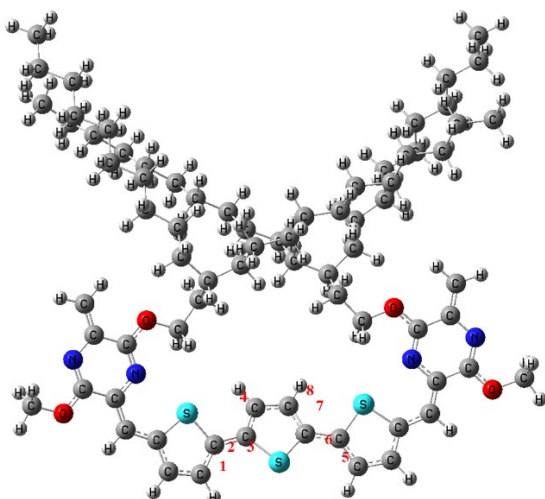

| Structure | D <sub>(1-2-3-4)</sub> (°) | D <sub>(5-6-7-8)</sub> (°) | H-L Gap (eV) | $\lambda_{(Theo)}$ (nm) | $\lambda_{(expt)}$ (nm) |
|-----------|----------------------------|----------------------------|--------------|-------------------------|-------------------------|
| P1        | 16.18                      | 20.15                      | 2.31         | 613.14                  | 637                     |
| P2        | 13.69                      | 12.72                      | 2.17         | 651.14                  | 579                     |
| P3        | 11.69                      | 14.35                      | 2.21         | 638.6                   | 594                     |
| P4        | 10.61                      | 19.10                      | 2.26         | 625.61                  | 610                     |
| P5        | 12.22                      | 16.57                      | 2.26         | 627.49                  | 512                     |

Notes: D (1-2-3-4) is the size of the dihedral angle formed by atoms No. 1, 2, 3, and 4, i.e. the angle between the plane of atoms No. 1, 2, 3 and 2, 3 and 4. Level of Theory: B3LYP-D3/Def2-SV(P)

### S2.2 P1~P5 simulation system calculation.

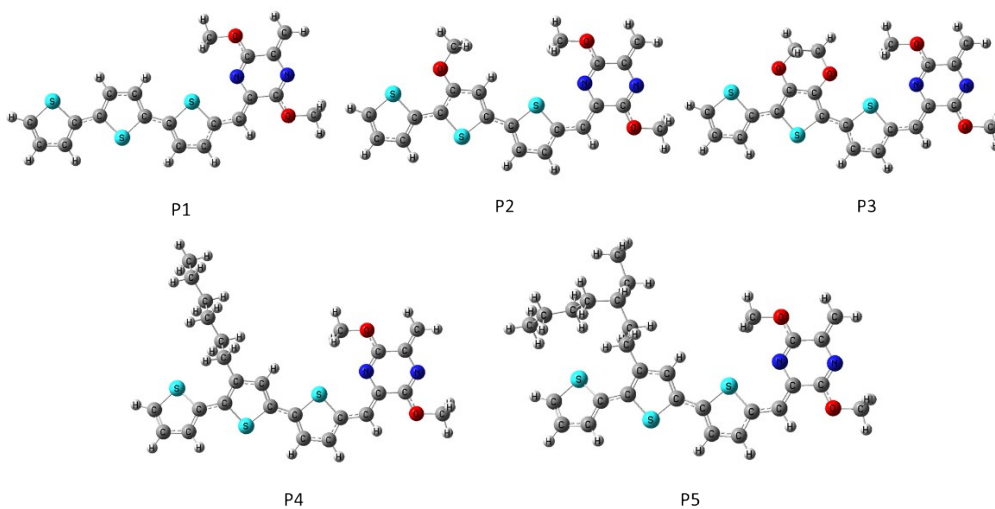

### S2.3 P1~P5 simplify the system.

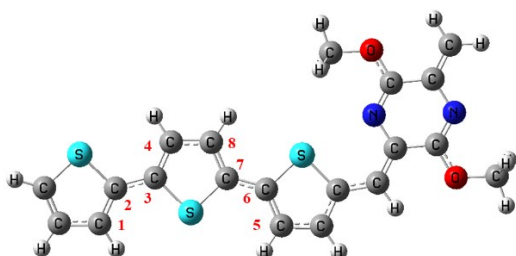

| Structure | D <sub>(1-2-3-4)</sub> (°) | D <sub>(5-6-7-8)</sub> (°) | H-L Gap (eV) | $\lambda_{(Theo)}$ (nm) | $\lambda_{(expt)}$ (nm) |
|-----------|----------------------------|----------------------------|--------------|-------------------------|-------------------------|
| P1        | 7.39                       | 0.84                       | 2.55         | 537.92                  | 637                     |
| P2        | 0.00                       | 0.00                       | 2.42         | 567.87                  | 579                     |
| P3        | 0.30                       | 0.22                       | 2.46         | 557.31                  | 594                     |
| P4        | 28.00                      | 6.77                       | 2.58         | 531.01                  | 610                     |
| P5        | 28.91                      | 9.57                       | 2.59         | 529.26                  | 512                     |

Level of Theory: B3LYP-D3/Def2-TZVP

### S2.3 P1~P5 simplify the system calculation.

| ligand                           | $\lambda$ (simulation, Theo) (nm) | $\lambda$ (simplification, Theo) (nm) | $\lambda$ (reference, Theo) (nm) | $\lambda$ (expt) (nm) |
|----------------------------------|-----------------------------------|---------------------------------------|----------------------------------|-----------------------|
| H                                | 613.14                            | 537.92                                | 345.6                            | 637                   |
| OCH <sub>3</sub>                 | 651.14                            | 567.87                                | 364.26                           | 579                   |
| (OCH <sub>2</sub> ) <sub>2</sub> | 638.6                             | 557.31                                | 373.23                           | 594                   |
| C <sub>6</sub> H <sub>13</sub>   | 625.61                            | 531.01                                | 356.4                            | 610                   |
| C <sub>9</sub> H <sub>19</sub>   | 627.49                            | 529.26                                | 355.78                           | 512                   |

#### S2.4 Comparison of theoretical and experimental results.

Theoretical Calculation Additional Notes:

1. Simulation system. The molecular model is not simplified, but only 1.5 repeating units are selected. As can be seen from the structure, there is no molecular interaction between each repeating unit
2. The system is simplified. Compared with the simulated system, the two substituents of C<sub>10</sub>H<sub>21</sub> and C<sub>8</sub>H<sub>17</sub>, which are connected to the heterocyclic ring, are simplified
3. The reference system, which is a simple conjugate chain, only considers the influence of substituents on the absorption wavelength of the conjugate chain.

Because the experimental result is a periodic system, it is not easy to directly compare the absolute value of the absorbed light wavelength calculated in theory with the experimental result, but the relative value of the absorbed light wavelength in different structures should be able to compare with the experimental value. You can see that the three kinds of theoretical calculation results of absorption wavelength is relative order, C<sub>6</sub>H<sub>13</sub> and C<sub>9</sub>H<sub>19</sub> ligand replaced results are close to, the results of the two oxygen ligands are close to, illustrates a few kinds roughly theory model, the theoretical calculation result is stable, the result is reliable, similar substituent, replace the effect is similar, this is reasonable, but the theoretical results don't quite match the experimental ones, for reasons that are not clear.

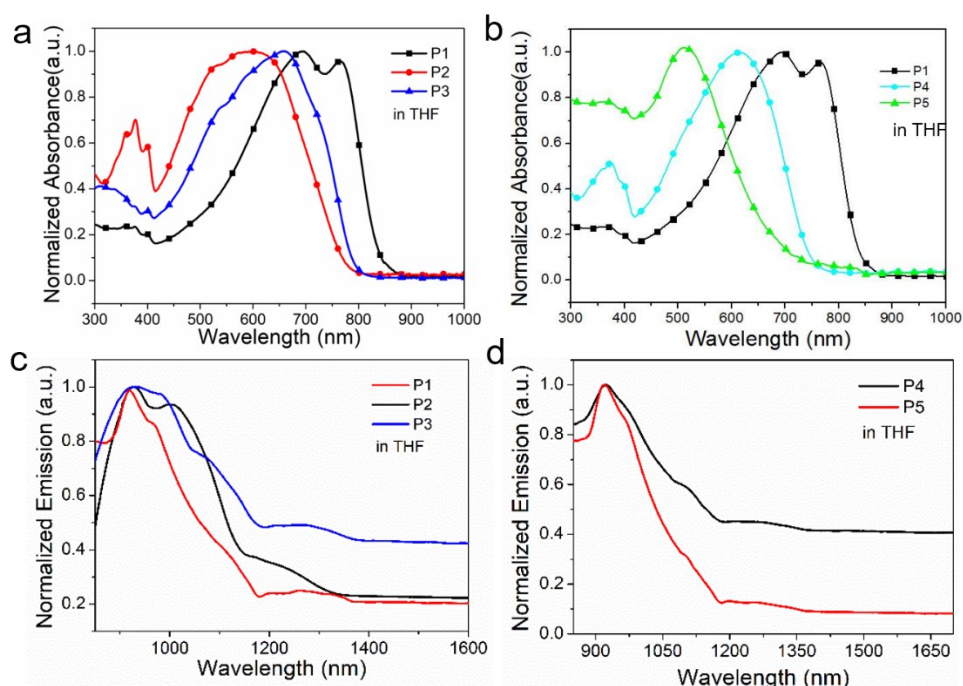

Figure S4 The absorption and Fluorescence emission spectrum in THF was obtained with an 808 nm excitation laser a) The UV-Vis-NIR absorption spectrum of the P1, P2, and P3; b) The UV-Vis-NIR absorption spectrum of the P4, and P5; c) The Fluorescence emission spectra of P1, P2, and P3; d) The Fluorescence emission spectra of P4, and P5.

## Reagents and Instruments (Table S2)

Table S2.1 Reagent

| Name                              | Size           | Source       |
|-----------------------------------|----------------|--------------|
| Thiophene                         | 99%            | Aladdin      |
| 3-Methoxythiophene                | 98%            | Aladdin      |
| 3,4-Ethylenedioxythiophene        | 99%            | Aladdin      |
| 3-Hexylthiophene                  | 98%            | Aladdin      |
| 3-(2-Ethylhexyl)thiophene         | 97%            | Aladdin      |
| 1,4-diacetylpiperazine-2,5-dione  | 96%            | Macklin      |
| 5-Bromo-2-thiophenecarboxaldehyde | 97%            | Aladdin      |
| Trimethyltin chloride             | 1.0M in hexane | J&K Chemical |
| n-Butyllithium                    | 1.6M in hexane | Aladdin      |



|                                         |       |                                                           |
|-----------------------------------------|-------|-----------------------------------------------------------|
| Terakis(triphenylphosphine)palladium(0) | 99%   | Macklin                                                   |
| Calcium hydride                         | 98.5% | Aladdin                                                   |
| N-Bromosuccinimide                      | 98%   | Aladdin                                                   |
| Dichloromethane                         | 99.5% | Aladdin                                                   |
| Petroleum ether                         | AR    | Aladdin                                                   |
| Methanol                                | 99.5% | Aladdin                                                   |
| N,N-Dimethylformamide                   | 99.5% | Aladdin                                                   |
| Tetrahydrofuran                         | 99%   | Aladdin                                                   |
| BCap 37 cells                           |       | Hangzhou Genuo Biomedical<br>Technology Co., Ltd Co., Ltd |
| Fetal bovine serum                      |       | Hangzhou Genuo Biomedical<br>Technology Co., Ltd Co., Ltd |

**Table S2.2 Instrument**

| Instrument                        | Type              | Company                                                      |
|-----------------------------------|-------------------|--------------------------------------------------------------|
| Vacuum pump                       | 2XZ-2             | Linhai Tan Vacuum Equipment Co.,<br>Ltd                      |
| Rotary evaporators                | RV8               | IKA group experimental equipment<br>co., LTD                 |
| Aqua bi-distilling apparatus      | SZ-93             | Shanghai Yarong Biochemical<br>Instrument Factory            |
| Ultrasonic cleaner                | QT08              | Tianjin Ruipu Electronic Instrument<br>Co., Ltd              |
| Magnetic stirring apparatus       | IKAC-MAG<br>HS 7  | Beijing Dalong Xingchuang<br>Experimental Instrument Co. Ltd |
| Uv-Vis-NIR spectrophotometer      | UH4150            | Hitachi High-Technologies<br>Corporation                     |
| Transmission electron microscopy  | JSM-6309LV        | JEOL company                                                 |
| Table centrifuge                  | L400              | Hunan Xiangyi Laboratory Instrument<br>Development Co. Ltd   |
| Fluorescence spectrophotometer    | FLS 1000          | Edinburgh Instruments,EI                                     |
| NIR-II living small animal imager | UniNano-NIR<br>II | Huijia Biological Co., Ltd                                   |
| Electronic scales                 | FA1004B           | Shanghai Keping Instrument Co., Ltd                          |

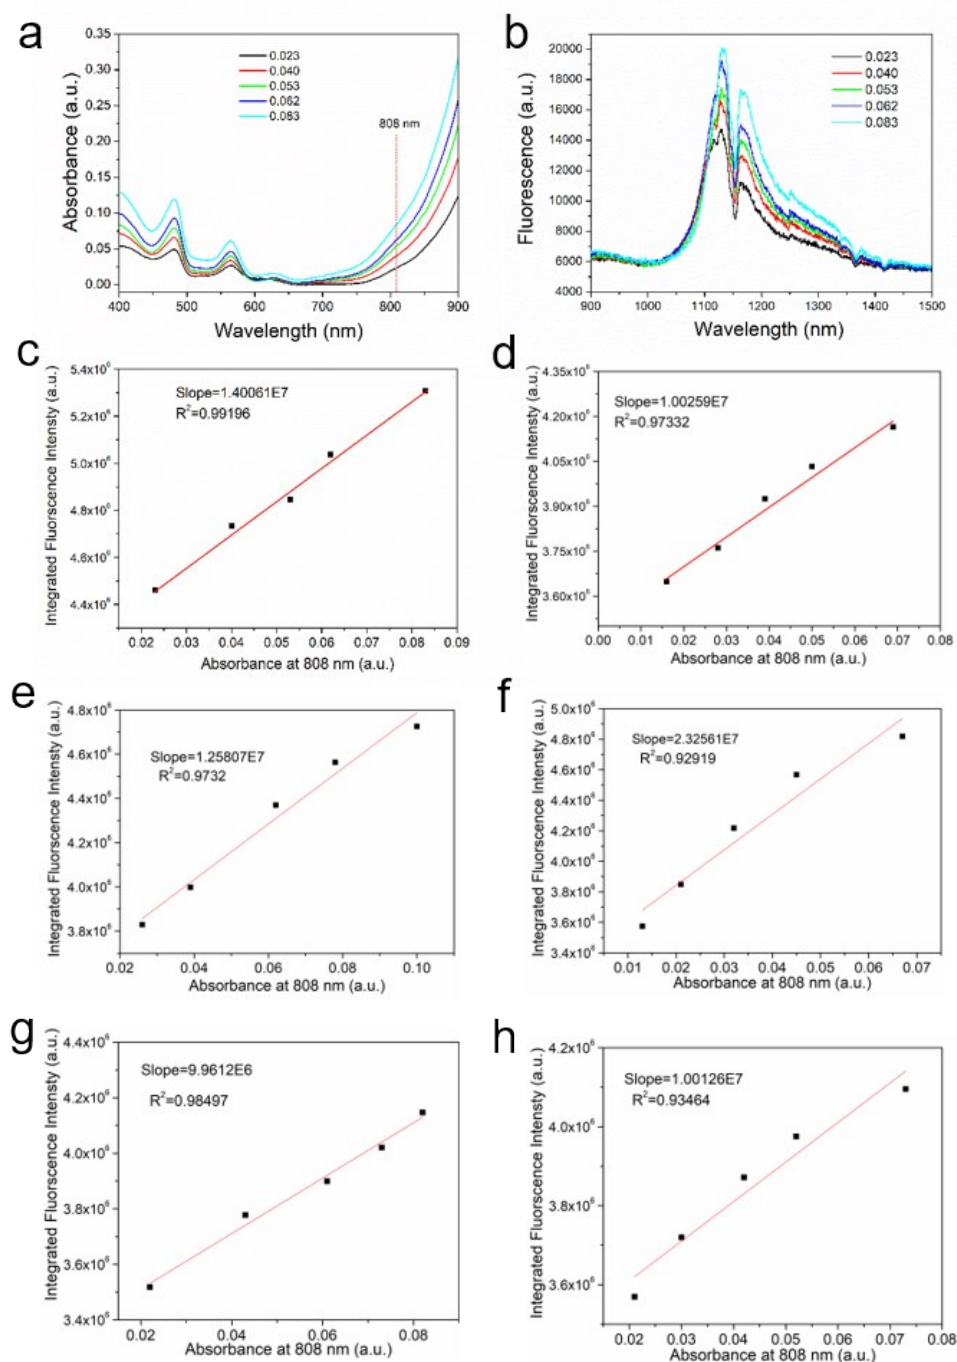

Figure S5 Fluorescence quantum yield measurement. Absorbance a) and fluorescence b) spectrum of IR-26 in DCE; c), d), e), f), g) and h) Linear fit of IR-26, P1 NPs, P2 NPs, P3 NPs, P4 NPs, and P5 NPs. The quantum yield was calculated in the following manner:

$$QY_{P1} = QY_{IR\ 26} \times (Slop_{P1} / Slop_{IR\ 26}) \times (n_{P1}^2 / n_{IR-26}^2)$$

The refractive indices (SNP) of water and dichloromethane solution was 1.333 and 1.424 in this case, respectively.
